# Supplementary material for: Bisphosphonate metal complexes as selective inhibitors of Trypanosoma cruzi farnesyl diphosphate synthase
Source: Royal Society of Chemistry journal article supplement (doi:10.1039/c2dt12179d), 2012-01-01
Supplement: c2dt12179d.pdf [file c2dt12179d.pdf]

**Table S1.** Hydrogen bonds for  $[\text{Cu}^{\text{II}}_2(\text{Ale})_4(\text{H}_2\text{O})_2] \cdot 2\text{H}_2\text{O}$  (Å and °)

| D-H...A                | d(D-H)    | d(H...A) | d(D...A) | <(DHA) |
|------------------------|-----------|----------|----------|--------|
| N(5)-H(5A)...O(57)#2   | 0.91      | 2.19     | 2.942(3) | 139.4  |
| N(5)-H(5A)...O(84)#2   | 0.91      | 2.51     | 3.200(3) | 132.5  |
| N(5)-H(5B)...O(1)#2    | 0.91      | 1.95     | 2.843(4) | 168.4  |
| N(5)-H(5C)...O(4)#3    | 0.91      | 2.11     | 2.963(3) | 156.0  |
| N(66)-H(66A)...O(55)#4 | 0.91      | 2.22     | 3.103(4) | 164.0  |
| N(66)-H(66A)...O(56)#4 | 0.91      | 2.35     | 3.024(4) | 130.4  |
| N(66)-H(66B)...O(5)#5  | 0.91      | 2.19     | 2.936(4) | 138.3  |
| N(66)-H(66B)...O(2)#6  | 0.91      | 2.64     | 3.288(4) | 128.5  |
| N(66)-H(66C)...O(9)#1  | 0.91      | 2.32     | 3.069(4) | 139.2  |
| N(66)-H(66C)...O(21)   | 0.91      | 2.30     | 3.058(4) | 140.7  |
| O(57)-H(57)...O(55)#4  | 0.84      | 1.77     | 2.541(3) | 152.4  |
| O(2)-H(2)...O(1)#3     | 0.84      | 1.85     | 2.510(3) | 135.0  |
| O(5)-H(5)...O(6)#7     | 0.84      | 1.87     | 2.539(3) | 135.1  |
| O(56)-H(56)...O(58)#1  | 0.84      | 1.77     | 2.535(3) | 150.0  |
| O(99)-H(1W)...O(84)#8  | 0.825(18) | 2.36(2)  | 3.174(4) | 168(4) |
| O(99)-H(2W)...O(6)#7   | 0.809(18) | 2.00(2)  | 2.798(3) | 170(4) |
| O(3)-H(3)...O(58)      | 0.84      | 1.98     | 2.813(3) | 170.5  |

Symmetry transformations used to generate equivalent atoms:

#1 -x,-y+2,-z #2 -x+1,-y+2,-z+1 #3 -x+1, y+1/2, -z+1/2

#4 x,-y+3/2,z+1/2 #5 x-1,y,z #6 -x,y-1/2,-z+1/2

#7 -x+1,-y+2,-z #8 x,-y+3/2,z-1/2

**Table S2.** Hydrogen bonds for  $[\text{Co}^{\text{II}}(\text{Pam})_2(\text{H}_2\text{O})_2]$  (Å and °)

| D-H...A             | d(D-H)  | d(H...A) | d(D...A) | <(DHA) |
|---------------------|---------|----------|----------|--------|
| N(1)-H(1C)...O(1)#2 | 0.89    | 2.35     | 3.038(7) | 134.0  |
| N(1)-H(1C)...O(4)#3 | 0.89    | 2.32     | 3.107(7) | 147.0  |
| N(1)-H(1A)...O(2)#4 | 0.89    | 2.14     | 2.977(7) | 155.4  |
| N(1)-H(1A)...O(7)#5 | 0.89    | 2.60     | 3.125(7) | 118.9  |
| N(1)-H(1B)...O(6)#6 | 0.89    | 2.30     | 3.085(6) | 147.1  |
| N(1)-H(1B)...O(3)#7 | 0.89    | 2.61     | 3.239(7) | 128.2  |
| O(7)-H(71)...O(6)#3 | 0.91(8) | 1.89(8)  | 2.743(6) | 156(7) |
| O(7)-H(72)...O(8)#4 | 0.84(9) | 2.13(9)  | 2.889(6) | 150(8) |
| O(7)-H(72)...O(5)#1 | 0.84(9) | 2.51(8)  | 2.911(7) | 111(7) |
| O(8)-H(8)...O(1)#8  | 0.82    | 2.14     | 2.850(6) | 145.3  |
| O(8)-H(8)...O(5)    | 0.82    | 2.68     | 3.124(6) | 115.9  |
| O(2)-H(2)...O(6)#9  | 0.82    | 2.11     | 2.509(6) | 109.8  |
| O(5)-H(5)...O(3)#8  | 0.82    | 1.86     | 2.473(6) | 130.3  |

Symmetry transformations used to generate equivalent atoms:

#1 -x,-y+1,-z+1 #2 x+1,y,z #3 -x+1,-y+1,-z+1

#4 -x+1/2,y-1/2,-z+3/2 #5 x+1/2,-y+1/2,z+1/2

#6 -x+3/2,y-1/2,-z+3/2 #7 -x+1,-y+1,-z+2 #8 -x+1/2,y+1/2,-z+3/2

#9 x-1/2,-y+3/2,z+1/2

**Table S3.** Hydrogen bonds for [Ni(Pam)<sub>2</sub>(H<sub>2</sub>O)<sub>2</sub>] (Å and °).

| D-H...A             | d(D-H)  | d(H...A) | d(D...A) | <(DHA) |
|---------------------|---------|----------|----------|--------|
| O(9)-H(14)...O(7)#2 | 0.98(7) | 1.55(7)  | 2.522(3) | 173(6) |
| O(6)-H(13)...O(8)   | 0.86(6) | 2.75(6)  | 3.105(3) | 106(4) |
| O(6)-H(13)...O(2)#3 | 0.86(6) | 2.04(6)  | 2.840(3) | 155(5) |
| O(3)-H(12)...O(7)#4 | 0.97(5) | 1.81(5)  | 2.741(3) | 160(4) |
| N(1)-H(1C)...O(1)#4 | 0.89    | 2.36     | 3.122(4) | 143.4  |
| N(1)-H(1C)...O(2)#5 | 0.89    | 2.30     | 3.032(4) | 138.8  |
| N(1)-H(1A)...O(7)#6 | 0.89    | 2.30     | 3.081(4) | 147.2  |
| N(1)-H(1B)...O(3)#7 | 0.89    | 2.65     | 3.148(4) | 116.5  |
| N(1)-H(1B)...O(9)#8 | 0.89    | 2.12     | 2.971(4) | 159.4  |
| O(3)-H(3)...O(8)#1  | 0.73(5) | 2.51(5)  | 2.921(3) | 117(5) |
| O(3)-H(3)...O(6)#8  | 0.73(5) | 2.25(5)  | 2.887(3) | 145(5) |
| O(8)-H15...O(5)#2   | 1.20(4) | 1.27(4)  | 2.464(3) | 171(5) |

Symmetry transformations used to generate equivalent atoms:

#1 -x,-y+2,-z #2 x-1/2,-y+3/2,z+1/2 #3 -x+1/2,y-1/2,-z+1/2

#4 -x+1,-y+2,-z #5 x+1,y,z #6 -x+3/2,y+1/2,-z+1/2

#7 x+1/2,-y+5/2,z+1/2 #8 -x+1/2,y+1/2,-z+1/2

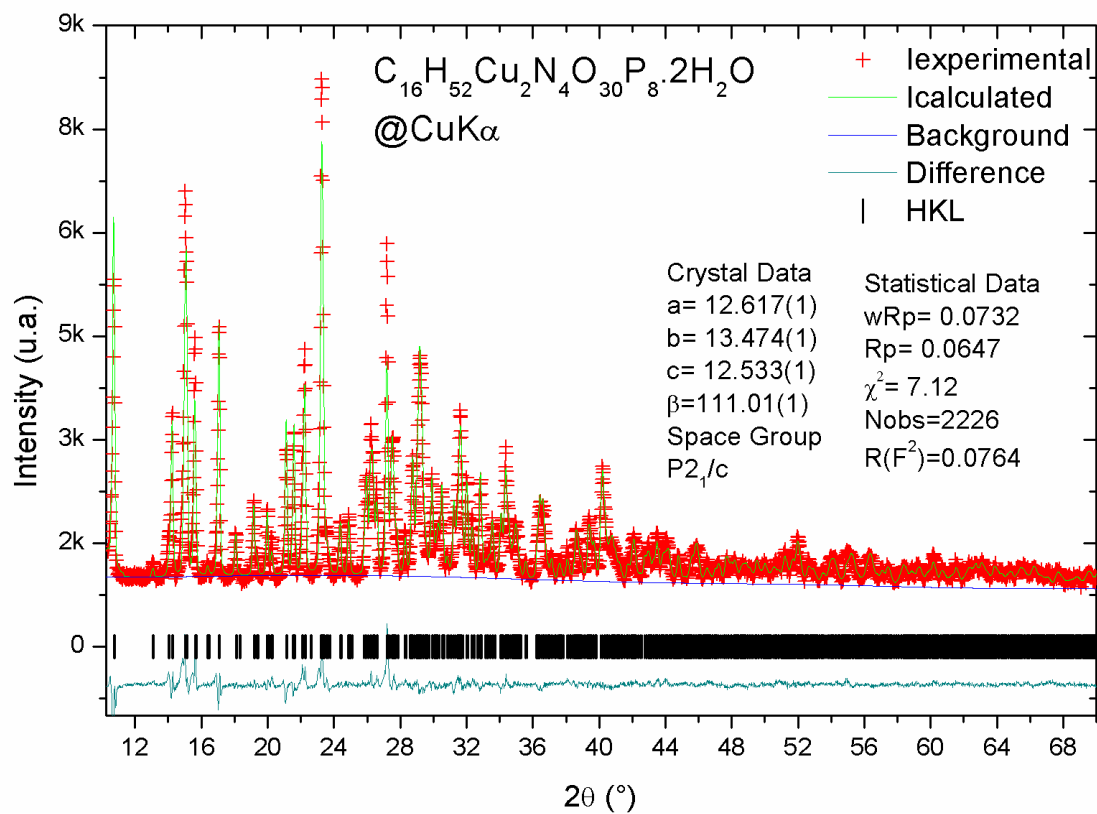

**Figure S1-** Rietveld refinement for the  $C_{16}H_{52}Cu_2N_4O_{30}P_8 \cdot 2H_2O$  compound, indicating the experimental data, the calculated intensities, the background function, the difference curve and the Bragg positions.

**Table S4.** Level of BSA binding of the complexes after 48 h incubation

| <b>Compound</b>                                                  | <b>Interaction with BSA(%)</b> | <b>Compound</b>                                                 | <b>Interaction with BSA(%)</b> |
|------------------------------------------------------------------|--------------------------------|-----------------------------------------------------------------|--------------------------------|
| $[\text{Cu}^{\text{II}}(\text{Pam})] \cdot \text{H}_2\text{O}_n$ | 98                             | $[\text{Cu}^{\text{II}}_2(\text{Ale})_4(\text{H}_2\text{O})_2]$ | 94                             |
| $[\text{Co}^{\text{II}}(\text{Pam})_2(\text{H}_2\text{O})_2]$    | 76                             | $[\text{Co}^{\text{II}}_2(\text{Ale})_4(\text{H}_2\text{O})_2]$ | 54                             |
| $[\text{Ni}^{\text{II}}(\text{Pam})_2(\text{H}_2\text{O})_2]$    | 91                             | $[\text{Ni}^{\text{II}}_2(\text{Ale})_4(\text{H}_2\text{O})_2]$ | 88                             |
| $[\text{Mn}^{\text{II}}(\text{Pam})_2(\text{H}_2\text{O})_2]$    | 0                              | $[\text{Mn}^{\text{II}}_2(\text{Ale})_4(\text{H}_2\text{O})_2]$ | 52                             |
